# Supplementary material for: Randomized controlled trial on the influence of dietary intervention on epigenetic mechanisms in children with cow’s milk allergy: the EPICMA study
Source: PubMed Central journal article supplement (PMC6391485; doi:10.1038/s41598-019-38738-w), 2019-02-26
Supplement: 41598_2019_38738_MOESM1_ESM.pdf [file 41598_2019_38738_MOESM1_ESM.pdf]

**Randomized controlled trial on the influence of dietary intervention on epigenetic mechanisms in children with cow's milk allergy: the EPICMA study**

Lorella Paparo<sup>1,4†</sup>, [paparolorella@gmail.com](mailto:paparolorella@gmail.com)

Rita Nocerino<sup>1,4†</sup>, [ritanocerino@alice.it](mailto:ritanocerino@alice.it)

Cristina Bruno<sup>1</sup>, [cristinabruno88@libero.it](mailto:cristinabruno88@libero.it)

Carmen Di Scala<sup>1</sup>, [carmendiscale@gmail.com](mailto:carmendiscale@gmail.com)

Linda Cosenza<sup>1</sup>, [lindacosenza@libero.it](mailto:lindacosenza@libero.it)

Giorgio Bedogni<sup>2</sup>, [giorgiobedogni@gmail.com](mailto:giorgiobedogni@gmail.com)

Margherita Di Costanzo<sup>1</sup>, [mara.dicostanzo@live.it](mailto:mara.dicostanzo@live.it)

Maurizio Mennini<sup>3</sup>, [maurizio.mennini@gmail.com](mailto:maurizio.mennini@gmail.com)

Valeria D'Argenio<sup>4,5,7</sup>, [dargenio@ceinge.unina.it](mailto:dargenio@ceinge.unina.it)

Francesco Salvatore<sup>4,5,7</sup>, [salvator@unina.it](mailto:salvator@unina.it)

Roberto Berni Canani<sup>1,4,6,7</sup>, [berni@unina.it](mailto:berni@unina.it)

†Equal contributors

<sup>1</sup> Department of Translational Medical Science, University Federico II, Naples,, Italy

<sup>2</sup> Clinical Epidemiology Unit, Liver Research Center, Basovizza, Trieste, Italy

<sup>3</sup> Division of Allergy, Bambino Gesù Children's Hospital, Vatican City, Vatican City

<sup>4</sup> ImmunoNutritionLab at CEINGE-Biotecnologie Avanzate s.c.ar.l. Naples, Italy, University Federico II, Naples, Italy

<sup>5</sup> Department of Molecular Medicine and Medical Biotechnologies, University Federico II, Naples, Italy

<sup>6</sup> European Laboratory for the Investigation of Food-Induced Diseases, University Federico II, Naples, Italy

<sup>7</sup> Task Force on Microbiome Studies, University Federico II, Naples, Italy

**Supplementary Table 1.** Skin prick test, total and specific serum IgE values during the study.

|                                           | Group 1<br>(EHCF + LGG) |                          |                           | Group 2<br>(SF)        |                        |                          |
|-------------------------------------------|-------------------------|--------------------------|---------------------------|------------------------|------------------------|--------------------------|
|                                           | T0                      | T6                       | T12                       | T0                     | T6                     | T12                      |
| <b>Skin prick test to whole milk (mm)</b> | 0.76<br>(0.51 to 1.02)  | 0.51**<br>(0.36 to 0.67) | 0.06***<br>(0.01 to 0.12) | 0.99<br>(0.77 to 1.21) | 0.96<br>(0.81 to 1.11) | 0.93<br>(0.80 to 1.05)   |
| <b>Total IgE (kU/l)</b>                   | 359<br>(273 to 445)     | 324<br>(228 to 421)      | 195 *<br>(114 to 276)     | 437<br>(297 to 576)    | 391<br>(254 to 527)    | 386<br>(257 to 516)      |
| <b>nBosd 4 (kUA/l)</b>                    | 10.2<br>(4.6 to 15.8)   | 5.8<br>(1.5 to 10.2)     | 2.6<br>(0.36 to 4.7)      | 16.7<br>(3.4 to 30.0)  | 19.7<br>(2.01 to 37.4) | 16.5<br>(-1.65 to -34.6) |
| <b>nBosd 5 (kUA/l)</b>                    | 8.4<br>(4.8 to 11.9)    | 3.4<br>(1.0 to 5.9)      | 1.7<br>(0.4 to 3.0)       | 9.0<br>(3.5 to 14.6)   | 7.7<br>(3.9 to 11.5)   | 4.6<br>(2.05 to 7.07)    |
| <b>nBosd 6 (kUA/l)</b>                    | 4.58<br>(1.41 to 7.76)  | 2.12<br>(0.15 to 4.07)   | 1.17<br>(0.21 to 2.56)    | 3.01<br>(0.86 to 5.16) | 2.47<br>(0.55 to 4.4)  | 0.87<br>(0.11 to 1.63)   |
| <b>nBosd 8 (kUA/l)</b>                    | 33.0<br>(12.5 to 53.6)  | 16.6<br>(-0.2 to 33.3)   | 13.1<br>(-3.2 to 29.4)    | 28.9<br>(10.0 to 47.9) | 25.0<br>(5.7 to 44.0)  | 17.9<br>(-0.4 to -36.2)  |

\* $p < 0.05$ , \*\* $p < 0.01$  and \*\*\* $p < 0.001$

Values are means and cluster 95% confidence obtained from generalized linear models for continuous outcomes (see statistical analysis for details).

**Supplementary Table 2.** Effects of epigenetic mechanisms on immune tolerance acquisition

|                                                                       | Group 1<br>(EHCF + LGG)   |                            |                            | Group 2<br>(SF)           |                           |                          |
|-----------------------------------------------------------------------|---------------------------|----------------------------|----------------------------|---------------------------|---------------------------|--------------------------|
|                                                                       | T0                        | T6                         | T12                        | T0                        | T6                        | T12                      |
| <b>Fox P3 demethylation rate (prop)</b>                               | 0.013<br>(0.007 to 0.020) | 0.08 ***<br>(0.05 to 0.99) | 0.21 ***<br>(0.20 to 0.24) | 0.007<br>(0.001 to 0.011) | 0.018<br>(0.014 to 0.022) | 0.028<br>(0.022 to 0.34) |
| <b>IL to 4 methylation rate (prop)</b>                                | 0.29<br>(0.23 to 0.37)    | 0.51<br>(0.40 to 0.61)     | 0.65 **<br>(0.54 to 0.76)  | 0.28<br>(0.24 to 0.32)    | 0.37<br>(0.32 to 0.42)    | 0.44<br>(0.37 to 0.51)   |
| <b>IL to 5 methylation rate (prop)</b>                                | 0.35<br>(0.32 to 0.38)    | 0.60 ***<br>(0.51 to 0.69) | 0.73 ***<br>(0.62 to 0.84) | 0.32<br>(0.29 to 0.36)    | 0.39<br>(0.35 to 0.42)    | 0.42<br>(0.39 to 0.45)   |
| <b>IL to 10 methylation rate (prop)</b>                               | 0.77<br>(0.75 to 0.81)    | 0.64 *<br>(0.60 to 0.69)   | 0.47 **<br>(0.40 to 0.53)  | 0.78<br>(0.77 to 0.80)    | 0.72<br>(0.69 to 0.75)    | 0.61<br>(0.55 to 0.67)   |
| <b>INF <math>\gamma</math> methylation rate (prop)</b>                | 0.75<br>(0.72 to 0.79)    | 0.57 **<br>(0.49 to 0.65)  | 0.43 ***<br>(0.34 to 0.51) | 0.80<br>(0.76 to 0.79)    | 0.73<br>(0.71 to 0.76)    | 0.67<br>(0.63 to 0.71)   |
| <b>Fox P3 expression (fc)</b>                                         | 1.43 *<br>(1.08 to 1.78)  | 6.02 ***<br>(4.66 to 7.38) | 14.9 ***<br>(12.9 to 16.9) | 0.76<br>(0.49 to 1.02)    | 2.02<br>(1.12 to 2.93)    | 3.19<br>(1.99 to 4.39)   |
| <b>Log<sub>10</sub> IL to 4 concentration (pg/ml)</b>                 | 2.00<br>(1.89 to 2.1)     | 1.72<br>(1.6 to 1.9)       | 1.30<br>(1.1 to 1.5)       | 2.00<br>(1.92 to 2.1)     | 1.90<br>(1.78 to 2.02)    | 1.66<br>(1.48 to 1.84)   |
| <b>Log<sub>10</sub> IL to 5 concentration (pg/ml)</b>                 | 1.85<br>(1.77 to 1.90)    | 1.68<br>(1.50 to 1.85)     | 0.80 **<br>(0.39 to 1.14)  | 1.87<br>(1.79 to 1.94)    | 1.85<br>(1.72 to 1.99)    | 1.68<br>(1.59 to 1.78)   |
| <b>Log<sub>10</sub> IL to 10 concentration (pg/ml)</b>                | 1.33<br>(1.18 to 1.50)    | 1.58<br>(1.38 to 1.78)     | 1.80 ***<br>(1.70 to 1.90) | 1.11<br>(0.93 to 1.30)    | 1.24<br>(1.04 to 1.44)    | 1.4<br>(1.32 to 1.48)    |
| <b>Log<sub>10</sub> INF <math>\gamma</math> concentration (pg/ml)</b> | 0.20<br>(0.04 to 0.44)    | 1.04 **<br>(0.80 to 1.30)  | 1.72 ***<br>(1.55 to 1.89) | 0.08<br>(-0.06 to 0.22)   | 0.34<br>(0.22 to 0.45)    | 0.78<br>(0.54 to 1.01)   |
| <b>miR193 a5p (fc)</b>                                                | 0.84<br>(0.60 to 1.10)    | 3.86 *<br>(2.20 to 5.50)   | 7.87 ***<br>(6.65 to 9.09) | 0.55<br>(0.43 to 0.68)    | 1.37<br>(1.19 to 1.54)    | 1.88<br>(1.58 to 2.17)   |
| <b>miR155 (fc)</b>                                                    | 0.39<br>(0.19 to 0.59)    | 4.05 *<br>(2.20 to 5.90)   | 7.89 **<br>(5.3 to 10.4)   | 0.24<br>(0.11 to 0.37)    | 1.05<br>(0.45 to 1.65)    | 2.20<br>(1.04 to 3.39)   |
| <b>miR146 a (fc)</b>                                                  | 1.20<br>(0.59 to 1.81)    | 6.89 **<br>(5.4 to 8.37)   | 10.0 **<br>(7.89 to 12.1)  | 1.21<br>(0.52 to 1.91)    | 2.56<br>(1.80 to 3.31)    | 4.95<br>(3.10 to 6.82)   |
| <b>miR128 (fc)</b>                                                    | 1.03<br>(0.76 to 1.30)    | 4.76 *<br>(3.10 to 6.40)   | 7.89 **<br>(5.89 to 9.90)  | 0.98<br>(0.53 to 1.43)    | 2.07<br>(1.42 to 2.72)    | 2.91<br>(2.18 to 3.64)   |

\*  $p < 0.05$ , \*\*  $p < 0.01$  and \*\*\*  $p < 0.001$

Values are point estimates and cluster 95% confidence obtained from generalized linear models for fractional or continuous outcomes (see statistical analysis for details). Prop=proportion; fc=fold increase.

**Supplementary Table 3.** Composition of the study formulas (x 100 g).

| <b>Nutrient</b>                   | <b>Units</b> | <b>Extensively hydrolyzed casein formula with LGG (EHCF+LGG)</b> | <b>Soy Formula (SF)</b> |
|-----------------------------------|--------------|------------------------------------------------------------------|-------------------------|
| Energy                            | kcal         | 500                                                              | 459.2                   |
| Protein                           | g            | 14                                                               | 11.25                   |
| Carbohydrate                      | g            | 55                                                               | 47.7                    |
| Fat                               | g            | 25                                                               | 25                      |
| <i>Linoleic acid</i>              | g            | 4.5                                                              | 4.6                     |
| <i>α-linolenic acid</i>           | mg           | 340                                                              | -                       |
| <i>Arachidonic acid</i>           | mg           | 170                                                              | -                       |
| <i>Docosahexaenoic acid</i>       | mg           | 85                                                               | -                       |
| Vitamin A                         | μg           | 450                                                              | 413.10                  |
| Vitamin D                         | μg           | 7.5                                                              | 6.90                    |
| Vitamin E                         | mg           | 6.7                                                              | 4.70                    |
| Vitamin C                         | mg           | 105                                                              | 2.07                    |
| Thiamin (B1)                      | mg           | 0.4                                                              | 0.28                    |
| Riboflavin (B2)                   | mg           | 0.45                                                             | 0.43                    |
| Niacin                            | mg           | 5                                                                | 6.4                     |
| Vitamin B6                        | mg           | 0.3                                                              | 0.28                    |
| Folic Acid                        | μg           | 80                                                               | 73.6                    |
| Vitamin B12                       | μg           | 1.5                                                              | 2.15                    |
| Biotin                            | μg           | 15                                                               | 21.5                    |
| Vitamin K                         | μg           | 65                                                               | 50.7                    |
| Panthenic Acid                    | mg           | 2.5                                                              | 3.5                     |
| Choline                           | mg           | 120                                                              | 110                     |
| Inositol                          | mg           | 85                                                               | 23                      |
| Calcium                           | mg           | 565                                                              | 505                     |
| Sodium                            | mg           | 240                                                              | 211.4                   |
| Phosphorus                        | mg           | 390                                                              | 362.8                   |
| Iron                              | mg           | 9                                                                | 8.7                     |
| Magnesium                         | mg           | 50                                                               | 36.4                    |
| Zinc                              | mg           | 3.5                                                              | 3.6                     |
| Potassium                         | mg           | 610                                                              | 505                     |
| Chloride                          | mg           | 480                                                              | 298.5                   |
| Manganese                         | mg           | 0.3                                                              | 0.11                    |
| Copper                            | mg           | 0.38                                                             | 0.36                    |
| Iodine                            | μg           | 105                                                              | 73.6                    |
| Selenium                          | μg           | 11                                                               | 9.3                     |
| Chromium                          | μg           | 11                                                               | -                       |
| Molybdenum                        | μg           | 28                                                               | -                       |
| <i>Lactobacillus rhamnosus</i> GG | CFU          | 1x10 <sup>8</sup>                                                | -                       |
